# Supplementary material for: LNK promotes granulosa cell apoptosis in PCOS via negatively regulating insulin-stimulated AKT-FOXO3 pathway
Source: publisher site journal article supplement (doi:10.18632/aging.202421), 2021-01-20
Supplement: Supplementary file [file aging-v13i3-202421-supplementary-material-SD2.pdf]

## SUPPLEMENTARY TABLES

**Supplementary Table 1. Primer sequences used in quantitative RT-PCR.**

| Gene        | Forward primer               | Reverse primer              |
|-------------|------------------------------|-----------------------------|
| FOXO3-mouse | ACTGAGGAAAGGGGAAATGG         | CAAAGGTGTCAAGCTGTAAACG      |
| GLUT4-mouse | ACACTGGTCCTAGCTGTATTCT       | CCAGCCACGTTGCATTGTA         |
| GLUT4-human | ATCCTTGGACGATTCCCTCATTGG     | CAGGTGAGTGGGAGCAATCT        |
| LNK-mouse   | CCAATGTGGCGATAGAGAAAAGGTAAAG | CAAACCTCAGGTCAGCCTCTACATAGC |
| LNK-human   | AATAGGAGGGTGGCAAGAACAG       | TCCCCTAGCCCCAGTTAATTTAA     |
| FOXO3-human | TGTTGGTTTGAACGTGGGGA         | GTTTGAGGGTCTGCTTTGCC        |
| GAPDH-human | GAGCCAAAAGGGTCATCATCTC       | GGTCATGAGTCCTTCCACGATAC     |
| FSHR-human  | GCG GAA CCC CAA CAT CGT GTC  | TGA AGA AAT CTC TGC GAA AGT |
| GAPDH-mouse | AAGCCCATCACCATCTTCCA         | CCTGCCTCACCACCTTCTTG        |
| FSHR-mouse  | TGCTCTAACAGGGTCTTCCTC        | TCTCAGTTCAATGGCGTTCCG       |
| LHR-mouse   | GCCGCTGCACATTTTCAAC          | CAGTGGCAGAGTAGCTGCAC        |
| AMHR-mouse  | GGGGCTTTGGACACTGCTT          | GTCTCGGCATCCTTGCATCTC       |
| CYP19-mouse | AACCCCATGCAGTATAATGTCAC      | AGGACCTGGTATTGAAGACGAG      |
| AR-mouse    | TCCAAGACCTATCGAGGAGCG        | GTGGGCTTGAGGAGAACCAT        |

FOXO3, forkhead box class O3; GLUT4, glucose transporter 4; FSHR, follicle stimulating hormone receptor; LHR, luteinizing hormone receptor; AMHR, anti-Mullerian hormone type 2 receptor; CYP19, cytochrome P450, family 19; AR, androgen receptor.

**Supplementary Table 2. Antibodies used in western blot(WB) and immunofluorescence(IF).**

| Protein                                   | Company                   | Product code | Dilution     | Application | Molecular weight(k Da) |
|-------------------------------------------|---------------------------|--------------|--------------|-------------|------------------------|
| Akt (pan) (11E7) Rabbit mAb               | Cell Signaling Technology | 4685         | 1:1000       | WB          | 55-70                  |
| Phospho-Akt (Ser473) (D9E) XP® Rabbit mAb | Cell Signaling Technology | 4060         | 1:1000       | WB          | 55-70                  |
| FoxO3a (75D8) Rabbit mAb                  | Cell Signaling Technology | 99199        | 1:1000 1:500 | WB IF       | 70-100                 |
| β-Actin (13E5) Rabbit mAb                 | Cell Signaling Technology | 4970         | 1:1000       | WB          | 35-55                  |
| Phospho-FoxO3a (Ser253) Antibody          | Cell Signaling Technology | 9466S        | 1:1000 1:500 | WB IF       | 70-100                 |
| LNK antibody(A-12)                        | Santa Cruz Biotechnology  | sc-393709    | 1:1000       | WB          | 55-70                  |

**Supplementary Table 3. Correlation between LNK mRNA expression in granulosa cells and clinical features in patients.**

|                  |   | <b>FOXO3</b> | <b>BMI</b> | <b>WC</b> | <b>WHR</b> | <b>FPG</b> | <b>FIN</b> | <b>HOMA-I R</b> | <b>Oocyte maturation rate</b> |
|------------------|---|--------------|------------|-----------|------------|------------|------------|-----------------|-------------------------------|
| Total population | r | 0.6336       | 0.3648     | 0.3369    | 0.3170     | -0.0530    | 0.3400     | 0.3239          | -0.3519                       |
|                  | p | <0.0001      | 0.0038     | 0.0324    | 0.0460     | 0.6904     | 0.0158     | 0.0112          | 0.0353                        |
|                  | n | 52           | 54         | 54        | 54         | 50         | 50         | 50              | 36                            |
| PCOS             | r | 0.6759       | 0.3735     | 0.3605    | 0.3854     | 0.0121     | 0.4490     | 0.4722          | -0.4023                       |
|                  | p | <0.0001      | 0.0323     | 0.0427    | 0.0294     | 0.5430     | 0.0099     | 0.0073          | 0.0462                        |
|                  | n | 31           | 33         | 32        | 32         | 31         | 32         | 31              | 25                            |
| control          | r | 0.2335       | 0.3328     | 0.1765    | 0.1501     | 0.1720     | 0.0037     | 0.0175          | -0.3639                       |
|                  | p | 0.3084       | 0.0835     | 0.3689    | 0.4458     | 0.4007     | 0.9858     | 0.9337          | 0.3013                        |
|                  | n | 21           | 21         | 22        | 22         | 19         | 18         | 19              | 11                            |

BMI, body mass index; WC, waist circumference; WHR, waist-hip ratio; FPG, fasting plasma glucose; FIN, fasting insulin; HOMA-IR, homeostasis model assessment for insulin resistance.

**Supplementary Table 4. Correlation between FOXO3 mRNA expression in granulosa cells and clinical features in patients.**

|                  |   | <b>LNK</b> | <b>BMI</b> | <b>WC</b> | <b>WHR</b> | <b>FPG</b> | <b>FIN</b> | <b>HOMA-I R</b> | <b>Oocyte maturation rate</b> |
|------------------|---|------------|------------|-----------|------------|------------|------------|-----------------|-------------------------------|
| Total population | r | 0.6336     | 0.3989     | 0.3714    | 0.4166     | 0.2529     | 0.1244     | 0.1884          | -0.4900                       |
|                  | p | <0.0001    | 0.0012     | 0.0220    | 0.0011     | 0.0676     | 0.3749     | 0.1767          | 0.0024                        |
|                  | n | 52         | 47         | 47        | 47         | 47         | 47         | 47              | 36                            |
| PCOS             | r | 0.6759     | 0.4212     | 0.3775    | 0.4874     | 0.2075     | 0.0177     | 0.0873          | -0.5225                       |
|                  | p | <0.0001    | 0.0205     | 0.0397    | 0.0063     | 0.2626     | 0.9247     | 0.6407          | 0.0074                        |
|                  | n | 31         | 30         | 30        | 30         | 30         | 30         | 30              | 25                            |
| control          | r | 0.2335     | 0.1884     | 0.2954    | 0.1292     | 0.3144     | 0.4720     | 0.4757          | -0.2162                       |
|                  | p | 0.3084     | 0.3781     | 0.1611    | 0.5474     | 0.1542     | 0.0266     | 0.0253          | 0.5231                        |
|                  | n | 21         | 17         | 17        | 17         | 17         | 17         | 17              | 11                            |

BMI, body mass index; WC, waist circumference; WHR, waist-hip ratio; FPG, fasting plasma glucose; FIN, fasting insulin; HOMA-IR, homeostasis model assessment for insulin resistance.
